# Supplementary figures and images for: Continuous live imaging of adult neural stem cell division and lineage progression in vitro
Source: Oxford University Press journal article supplement (doi:10.1242/dev.061663), 2011-02-22

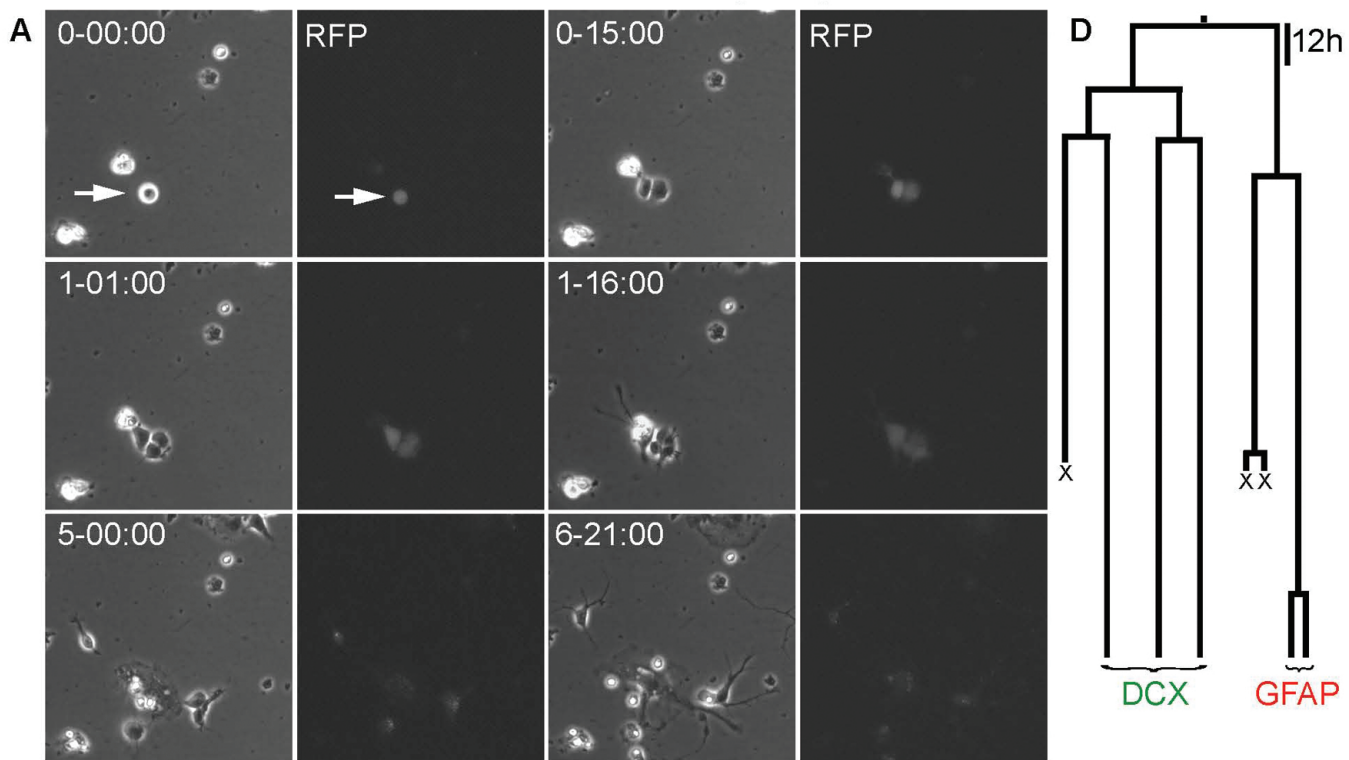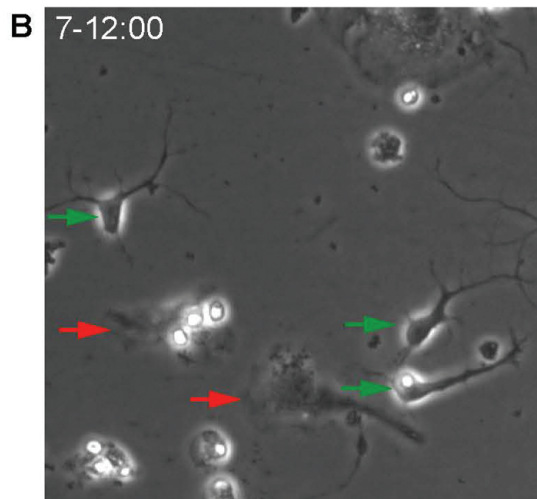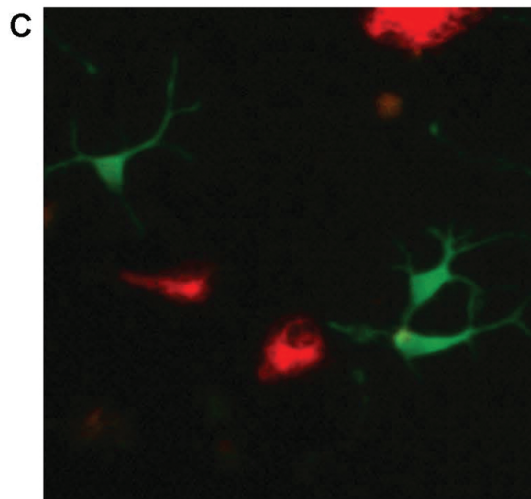

Supplement: dev061663figs10.pdf [file dev061663figs10.pdf]
